# Supplementary material
Source: PubMed Central journal article supplement (PMC9789208)
Supplement: NIHMS1851136-supplement-6.pdf [file NIHMS1851136-supplement-6.pdf]

# Supplementary Figure 6

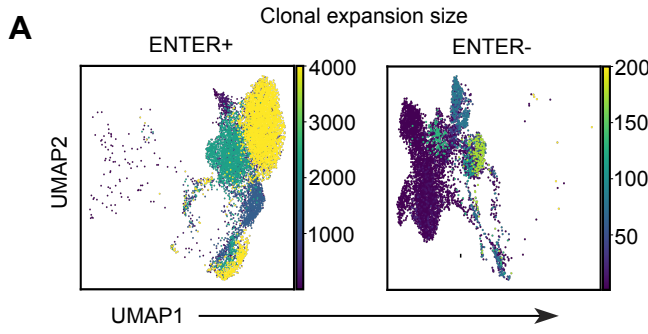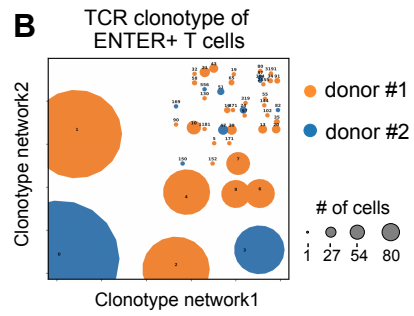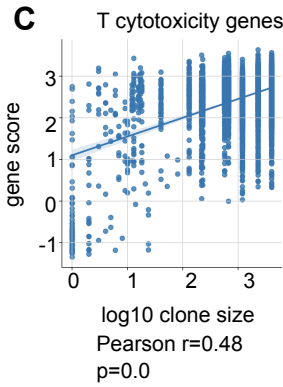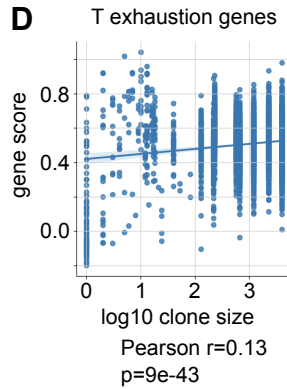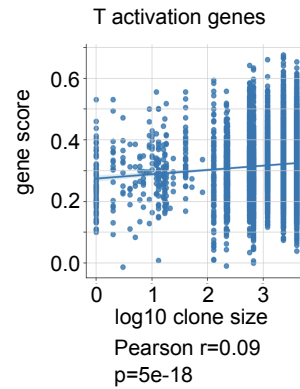

**E** pp65<sub>495-503</sub> specific TCR clones

| clone_id | CDR3_TCRb       | CDR3_TCRa     | donor | # cells |
|----------|-----------------|---------------|-------|---------|
| 0        | CASSFQGYTEAFF   | CAVYYGQNFVF   | #1    | 3856    |
| 1        | CASPVTGTGTGYTYF | CALKGNAGNMLTF | #2    | 2195    |
| 2        | CASSYQTGASYGYTF | CARNTGNQFYF   | #2    | 1166    |
| 3        | CASSFQGYTEAFF   | CAVYYGQNFVF   | #1    | 636     |
| 4        | CASPVTGTGTGYTYF | CALKGNAGNMLTF | #2    | 550     |
| 6        | CASSYQTGASYGYTF | CARNTGNQFYF   | #2    | 209     |

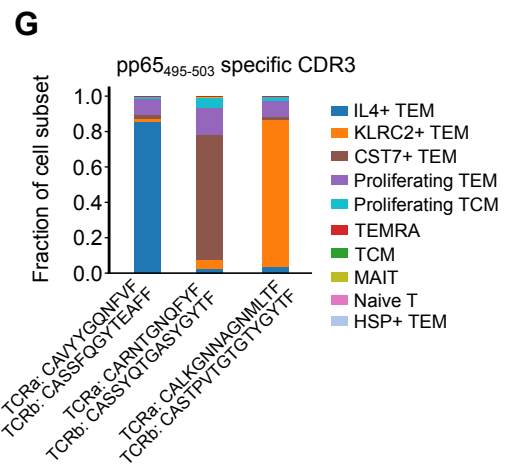

**F** US8<sub>74-82</sub> specific TCR clones

| clone_id | CDR3_TCRb       | CDR3_TCRa          | donor | # cells |
|----------|-----------------|--------------------|-------|---------|
| 8        | CASSLEGTGDEQFF  | CAFQGGYQKVTF       | #2    | 227     |
| 9        | CASSVEGLAGEQFF  | CAVGGGAQKLVF       | #2    | 16      |
| 24       | CATSDFEGRDTELFF | CAVTVTFSSGGYNKLI F | #1    | 6       |

UL100<sub>200-208</sub> specific TCR clones

| clone_id | CDR3_TCRb          | CDR3_TCRa     | donor | # cells |
|----------|--------------------|---------------|-------|---------|
| 20       | CASSPYGGGSDEQFF    | CASHNSGYALNF  | #2    | 13      |
| 16       | CATSPRQLAGVASYNQFF | CAVSRSNDYKLSF | #2    | 10      |
| 35       | CASSPYGGGSDEQFF    | N.A.          | #2    | 7       |
