# Supplementary material
Source: PubMed Central journal article supplement (PMC9789208)
Supplement: NIHMS1851136-supplement-8.pdf [file NIHMS1851136-supplement-8.pdf]

## SUPPLEMENTAL INFORMATION

**Table S1. Comparison of ENTER with other platforms. Related to Figures 4, 6, and 7.**

|                                   | DNA barcoded tetramer (TetTCR-seqHD) <sup>57</sup> | Cell reporter screen (T-scan <sup>4</sup> , SABR <sup>3</sup> etc) | Display techniques (Yeast, phage etc) <sup>7</sup> | Engineered viral platform |                       |                                        |
|-----------------------------------|----------------------------------------------------|--------------------------------------------------------------------|----------------------------------------------------|---------------------------|-----------------------|----------------------------------------|
|                                   |                                                    |                                                                    |                                                    | RAPTR <sup>56</sup>       | v-CARMA <sup>11</sup> | ENTER                                  |
| Antigen-TCR pairing               | ✓                                                  | ✓                                                                  | ✓                                                  | ✓                         | n.d.                  | ✓                                      |
| # of antigens                     | 10 <sup>2</sup> -10 <sup>3</sup> known             | 10 <sup>5</sup> known                                              | 10 <sup>8</sup> unknown                            | 10 <sup>2</sup> known     | n.a.                  | 10 <sup>1</sup> -10 <sup>2</sup> known |
| # of TCRs                         | 10 <sup>16</sup> unknown                           | 1-10 known                                                         | 1-10 known                                         | 10 <sup>5</sup> known     | n.a.                  | 10 <sup>16</sup> unknown               |
| Gene expression                   | ✓<br>500 genes/cell                                | X                                                                  | X                                                  | X                         | X                     | ✓<br>20,000 genes/cell                 |
| Apply to primary sample           | ✓                                                  | ✓                                                                  | X                                                  | n.a.                      | ✓                     | ✓                                      |
| Antigen-specific cargo delivery   | X                                                  | X                                                                  | X                                                  | X                         | ✓<br>T cell           | ✓<br>T cell and B cell                 |
| Cell type-specific cargo delivery | X                                                  | X                                                                  | X                                                  | X                         | X                     | ✓                                      |

n.d.: not done

n.a.: not available

**Table S2. Comparison of ENTER pMHC virus and pMHC tetramer. Related to Figures 2, 6, and 7.**

|                       | <b>ENTER pMHC virus</b>                                                                                                                       | <b>DNA barcoded pMHC tetramer</b>                                                                                                                                                                                                        |
|-----------------------|-----------------------------------------------------------------------------------------------------------------------------------------------|------------------------------------------------------------------------------------------------------------------------------------------------------------------------------------------------------------------------------------------|
| MHC expression system | Mammalian cell line: natural MHC glycosylation and proper folding in human cells                                                              | E. coli bacteria system: eukaryotic MHC post-translational modification and folding not possible                                                                                                                                         |
| Sensitivity           | More sensitive than pMHC tetramer on a molar basis per reagent                                                                                | Sensitive under a high concentration                                                                                                                                                                                                     |
| Throughput            | 12 pMHC ENTER viruses for single cell multi-omics profiling of antigen specificity, TCR clonality, and global transcriptomics.                | 1000 pMHC tetramers for only antigen specificity in bulk samples <sup>58</sup> .<br><br>100-250 pMHC tetramers for single cell multi-omics profiling of antigen specificity, TCR clonality, and targeted gene expression <sup>57</sup> . |
| Barcode               | 2 copy of barcoded viral RNA naturally assembled per viral particle.<br><br>ENTER-seq infer TCR affinity by analysis of pMHC binding per cell | Individual DNA barcode conjugation reaction may lead to uneven barcodes conjugated for tetramers.<br><br>No analysis of pMHC binding per cell has been done using DNA barcoded pMHC tetramers.                                           |
| Cost                  | \$10 for 10 tests (directly apply to 10x genomics platform)                                                                                   | \$1400 for 50 tests of commercial pMHC tetramer (not DNA barcoded)<br><br>>\$2000 for 50 tests of DNA barcoded pMHC tetramer/multimer                                                                                                    |
| Procedure             | 1. One-step Gibson assembly cloning to insert DNA oligo sequence (encoding 9aa peptide) into pMHC plasmid vector.                             | <b>Option 1</b> ( <i>Purchase and mix reagents in a convenient but high-cost manner</i> ):<br><br>Purchase peptides (GenScript), DNA barcoded and fluorophore conjugated Klickmer (Immudex),                                             |

|                       |                                                                                                                                                                                                                                                                                                                                                                                               |                                                                                                                                                                                                                                                                                                                                                                                                                                                                                                                                                                                                                                                                                                                                                                                                                                                                                                                                                                                                                                                                                                                              |
|-----------------------|-----------------------------------------------------------------------------------------------------------------------------------------------------------------------------------------------------------------------------------------------------------------------------------------------------------------------------------------------------------------------------------------------|------------------------------------------------------------------------------------------------------------------------------------------------------------------------------------------------------------------------------------------------------------------------------------------------------------------------------------------------------------------------------------------------------------------------------------------------------------------------------------------------------------------------------------------------------------------------------------------------------------------------------------------------------------------------------------------------------------------------------------------------------------------------------------------------------------------------------------------------------------------------------------------------------------------------------------------------------------------------------------------------------------------------------------------------------------------------------------------------------------------------------|
|                       | <p>2. Transfection of pMHC vector along with other ENTER vectors in HEK293T cells.</p> <p>3. Collect supernatant containing viruses after 48h and 72h after transfection.</p> <p>4. Viral concentration: add 1mL Lenti-X concentrator per 2mL supernatant, mix well and incubate at 4°C overnight, 2000Xg spin down for 45 min, resuspend pellet in 150uL DMEM medium (20X concentration)</p> | <p>and MHC-I monomers (immuneAware) (Total &gt;\$2000 for 50 tests). Mix peptides to MHC-I and Klickmer at specific ratios individually.</p> <p><b>Option 2</b> (<i>Generate most reagents in house in a relatively low-cost but more complicated manner</i>)<sup>59</sup></p> <ol style="list-style-type: none"> <li>1. Generation of biotinylated MHC-I monomers:       <ol style="list-style-type: none"> <li>(1) Expression and purification of MHC-I light chain B2M and heavy chain using bacteria system (25 steps).</li> <li>(2) MHC in vitro refolding, biotinylation and purification (25 steps)</li> </ol> </li> <li>2. Generation of peptides by in vitro transcription and translation.</li> <li>3. Generation of DNA barcoded fluorescent streptavidin.       <ol style="list-style-type: none"> <li>(1) Conjugation of DNA linker to commercial fluorescent labeled streptavidin (\$500).</li> <li>(2) Annealing and overlap extension to conjugate DNA barcodes to complementary DNA linker</li> </ol> </li> <li>4. pMHC UV exchange of peptides, tetramerization, and purification (8-10 steps).</li> </ol> |
| Specialized equipment | None                                                                                                                                                                                                                                                                                                                                                                                          | Size exclusion chromatography (HPLC) system with a gel-filtration column is required for purification of pMHC monomers.                                                                                                                                                                                                                                                                                                                                                                                                                                                                                                                                                                                                                                                                                                                                                                                                                                                                                                                                                                                                      |

**Table S3. List of TM domain sequence. Related to Figure 3 and STAR Methods**

| gene         | transmembrane domain       | cytoplasm domain |
|--------------|----------------------------|------------------|
| CD162(PSGL1) | LLAILLALVATIFFVCTVVL       | AVRLSRKGHMYPVRN  |
| LFA-1        | YLYVLSGIGGLLLLLLIFIVL      | YKVGFFKRNLK      |
| CD62L        | PLFIPVAVMVTAFSGLAFIIWLA    | RRLKKGKKSQR      |
| CD49d        | IVIISSSLLLGLIVLLLISYVMWK   | AGFFKRQYKS       |
| CD43         | GMLPVAVLVALLAVIVLVALLL     | WRRRQKRRT        |
| HLA-A2       | IVGIIAGLVLFGAVITGAVVAVMW   | RRKSSDRKG        |
| VSV-G        | FFFIIIGLIIGLFLVLRVGIHLCI   | KLKHTKKRQI       |
| ICAM1        | IVIITVVAAAVIMGTAGLSTYLY    | NRQRKIKKYRL      |
| HLA-Dra1     | NVVCALGLTVGLVGIIGTIFII     | KGLRKSNAAEERRGPL |
| PDGFR        | GTVVVISAILALVVLTIISLIILIML | WQKKPR           |

**Table S4. List of HLA peptide sequence. Related to Figure 2, 4, 5, 6, and 7**

| name                               | peptide     | HLA allele | antigen                 |
|------------------------------------|-------------|------------|-------------------------|
| NY-ESO-1 <sub>157-165</sub>        | SLLMWITQC   | A0201      | NY-ESO-1 (157-165)      |
| NY-ESO-1 <sub>157-165</sub><br>L3A | SLAMWITQC   | A0201      | NY-ESO-1 mutant peptide |
| NY-ESO-1 <sub>157-165</sub><br>T7A | SLLMWIAQC   | A0201      | NY-ESO-1 mutant peptide |
| pp65 <sub>495-503</sub>            | NLVPMVATV   | A0201      | CMV pp65 (495-503)      |
| pp65 <sub>363-373</sub>            | YSEHPTFTSQY | A0101      | CMV pp65 (363-373)      |
| M1 <sub>58-66</sub>                | GILGFVFTL   | A0201      | Influenza M1 (58-66)    |
| IE1 <sub>316-324</sub>             | VLEETSVML   | A0201      | CMV IE1 (316-324)       |
| IE1 <sub>81-89</sub>               | VLAELVKQI   | A0201      | CMV IE1 (81-89)         |
| pp65 <sub>14-22</sub>              | VLGPISGHV   | A0201      | CMV pp65 (14-22)        |
| pp65 <sub>120-128</sub>            | MLNIPSINV   | A0201      | CMV pp65 (120-128)      |
| pp65 <sub>188-196</sub>            | FPTKDVALR   | A0201      | CMV pp65 (188-196)      |
| pp65 <sub>325-333</sub>            | QIFLEVQAI   | A0201      | CMV pp65 (325-333)      |
| pp65 <sub>417-425</sub>            | TPRVTGGGA   | A0201      | CMV pp65 (417-425)      |
| UL46 <sub>100-108</sub>            | CLLESVYTA   | A0201      | CMV UL46 (100-108)      |
| UL100 <sub>200-208</sub>           | TLIVNLVEV   | A0201      | CMV UL100 (200-208)     |
| US8 <sub>74-82</sub>               | GVLDVWRV    | A0201      | CMV US8 (74-82)         |
| US150A <sub>152-161</sub>          | ALWDVALLEV  | A0201      | CMV US150A (152-161)    |

**Table S5. DNA Oligo sequences. Related to STAR Methods**

| name              | Sequence                                                         | note                                                         |
|-------------------|------------------------------------------------------------------|--------------------------------------------------------------|
| hs_TRAc_RT        | gttgaaggcggttgca                                                 | Reverse transcription (RT) primer for TCR alpha              |
| nyeso_TRAc_RT     | TCTTCTCAACGAGTTTAAACGT                                           | RT primer for NYESO-1 TCR alpha                              |
| HLA_nested_fw     | ccaccatggcgacgggttca                                             | For nested PCR to enrich HLA peptides                        |
| 10x_5pRNA_Fw      | ACACTCTTTCCctacacgacgctcttccg<br>atct                            | For nested PCR to enrich HLA peptides                        |
| P7_Tru_HLA_fw     | GTGACTGGAGTTCAGACGTGTG<br>CTCTTCCGATCTggttacaggaggctc<br>ggca    | PCR to add Illumina adapters for HLA peptide library         |
| P5_adapter        | ACACTCTTTCCCTACACGACGCT<br>CT                                    |                                                              |
| nyeso_TRAc_rev    | AACGTCACAGGAGCTTTCGGGA                                           | PCR to enrich TCR alpha fragments for mixed cell lines       |
| hs_TRAc_rev       | TGAAGGCGTTTGACATGCA                                              | PCR to enrich TCR alpha fragments for mixed cell lines       |
| P7_TRAc_nyeso_Rev | GTGACTGGAGTTCAGACGTGTG<br>CTCTTCCGATCTgggttttgatgtacgg<br>atgaac | Adding Illumina adapters for TCR library of mixed cell lines |
| P7_TRAc_hs_Rev    | GTGACTGGAGTTCAGACGTGTG<br>CTCTTCCGATCTcagctggttacacggc<br>agg    | Adding Illumina adapters for TCR library of mixed cell lines |
| 10xTSO_oligo      | tCCCATATAAGAAAc                                                  | in Enter pHLA display vector                                 |

|                                    |                                                           |                                            |
|------------------------------------|-----------------------------------------------------------|--------------------------------------------|
| 10xPCR_handle                      | AAGCAGTGGTATCAACGCAGAG<br>TAC                             | in Enter vector; for<br>cDNA amplification |
| Fas shRNA-1 sequence<br>under U6   | CCCTTGTGTTTGG AATTATAACT<br>CGAGTTATAATTCCAACACAAG<br>GG  |                                            |
| Fas shRNA-2 sequence<br>under U6   | GCGTATGACACATTGATTA AACT<br>CGAGTTTAATCAATGTGTCATAC<br>GC |                                            |
| Fas shRNA-3 sequence<br>under U6   | CCTGAAACAGTGGCAATAAATCT<br>CGAGATTTATTGCCACTGTTTCA<br>GG  |                                            |
| Control shRNA<br>sequence under U6 | CCTAAGGTTAAGTCGCCCTCGCT<br>CGAGCGAGGGCGACTTAACCTT<br>AGG  |                                            |
| CRISPR guide target<br>HLA-1       | CGGCTACTACAACCAGAGCG                                      |                                            |
| CRISPR guide target<br>HLA-2       | AGATCACACTGACCTGGCAG                                      |                                            |
| CRISPR guide target<br>HLA-3       | AGGTCAGTGTGATCTCCGCA                                      |                                            |
