# Supplementary material
Source: PubMed Central journal article supplement (PMC9789208)

# Supplementary Figure 1

## Viral binding and fusion detection

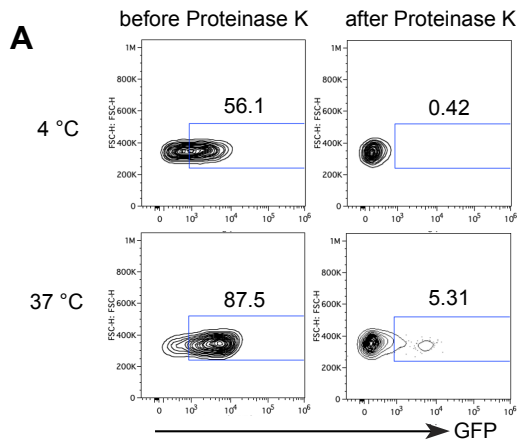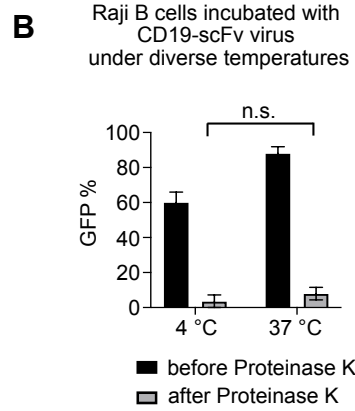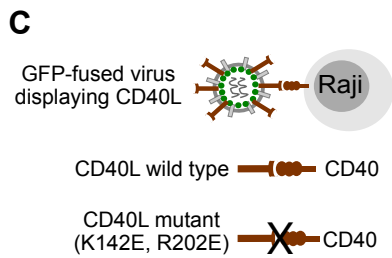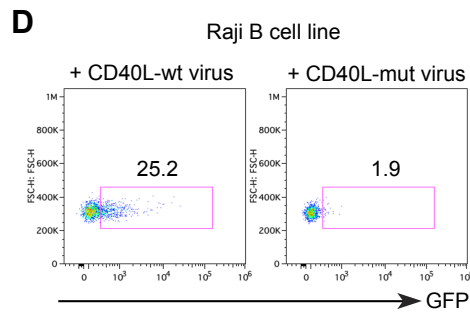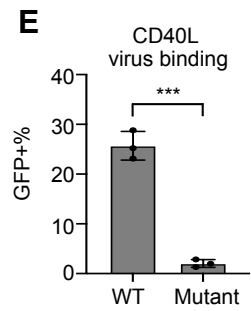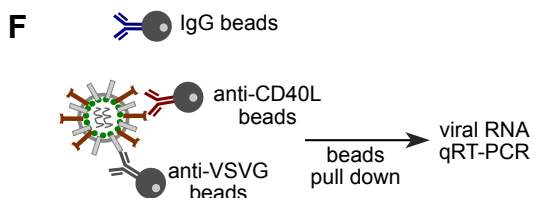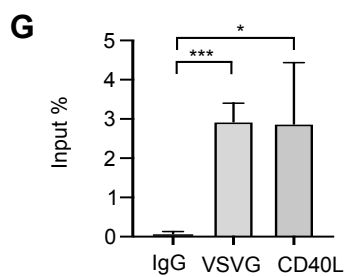

Supplement: NIHMS1851136-supplement-1.pdf [file NIHMS1851136-supplement-1.pdf]

# Supplementary Figure 2

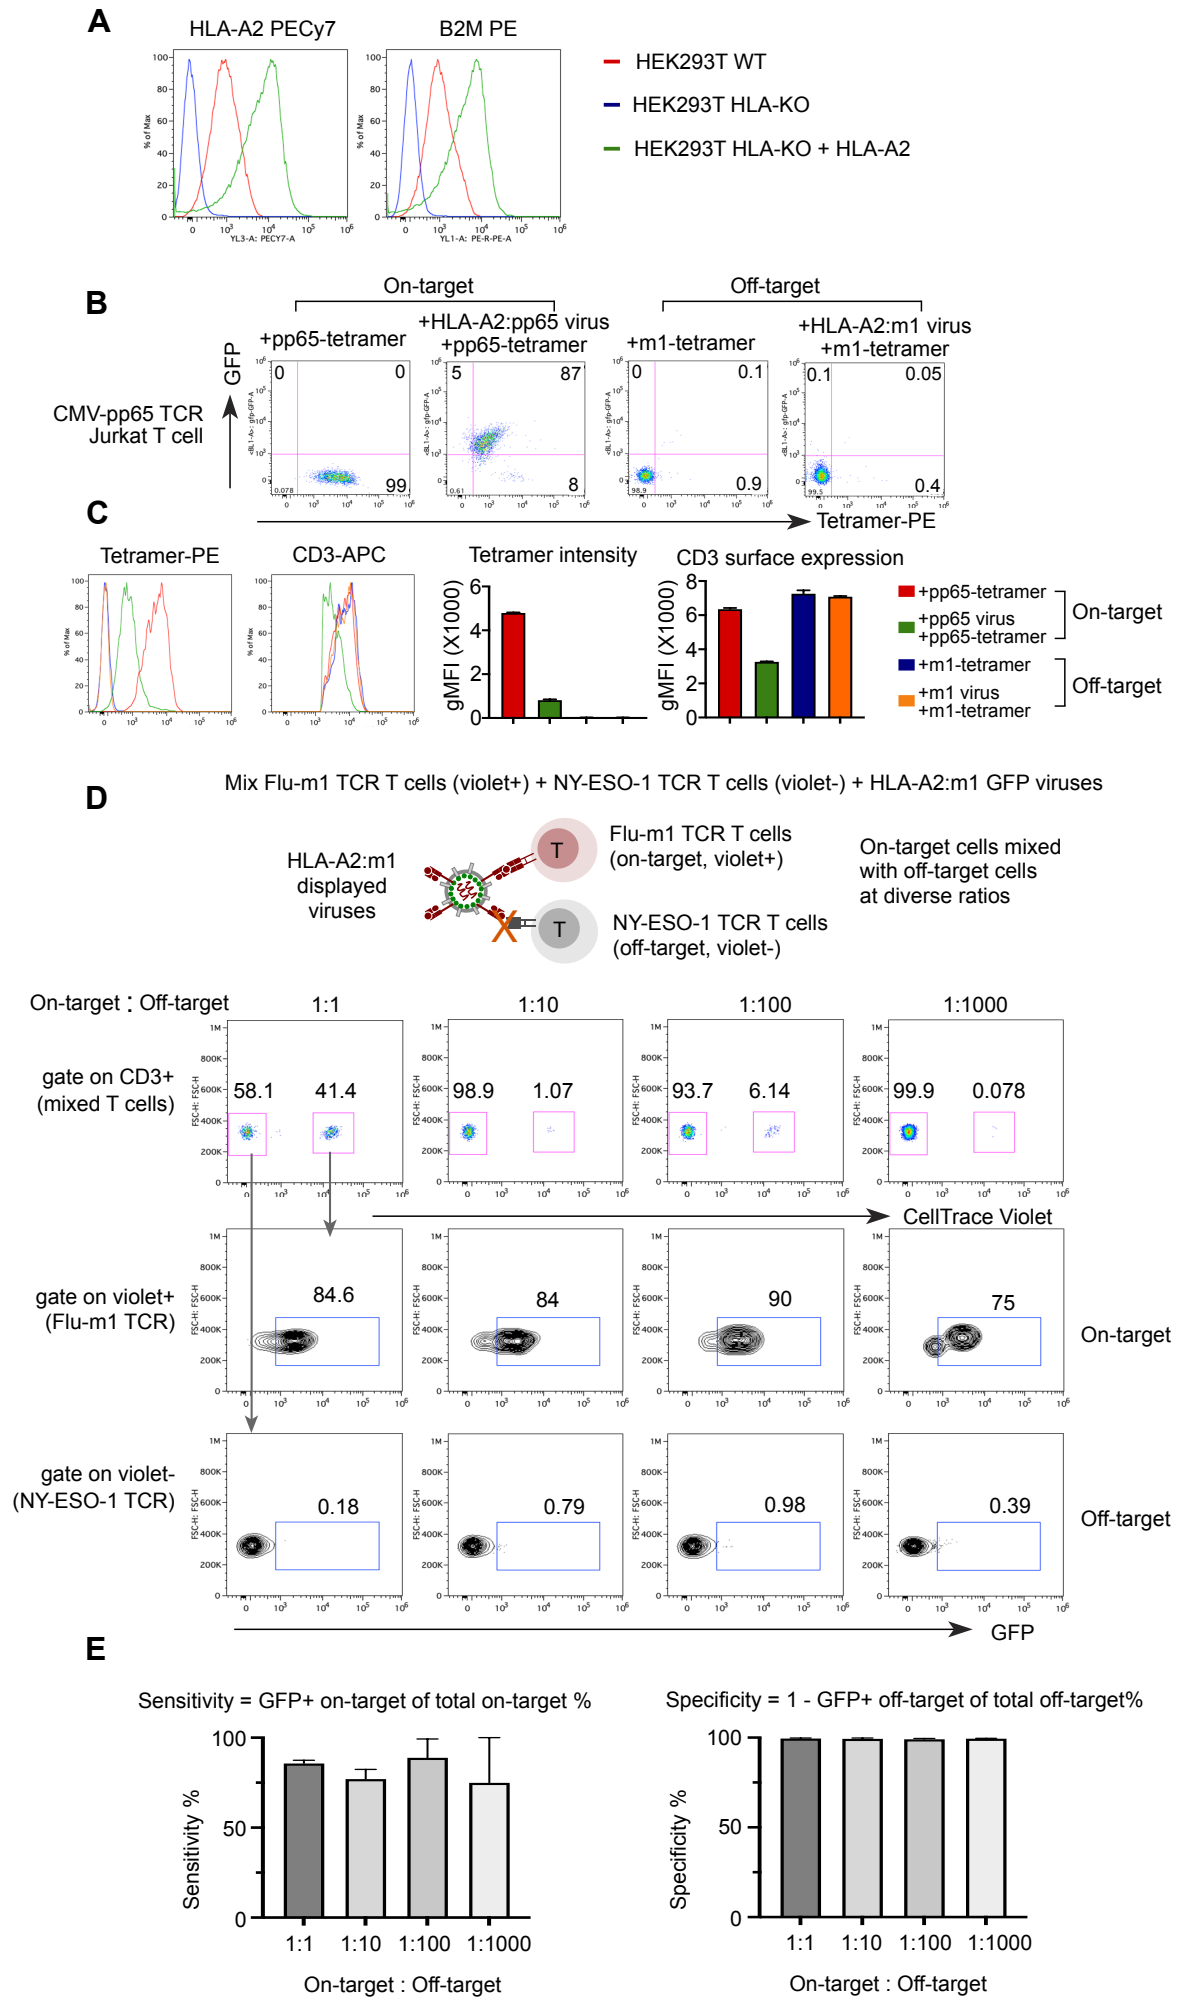

Supplement: NIHMS1851136-supplement-2.pdf [file NIHMS1851136-supplement-2.pdf]

# Supplementary Figure 3

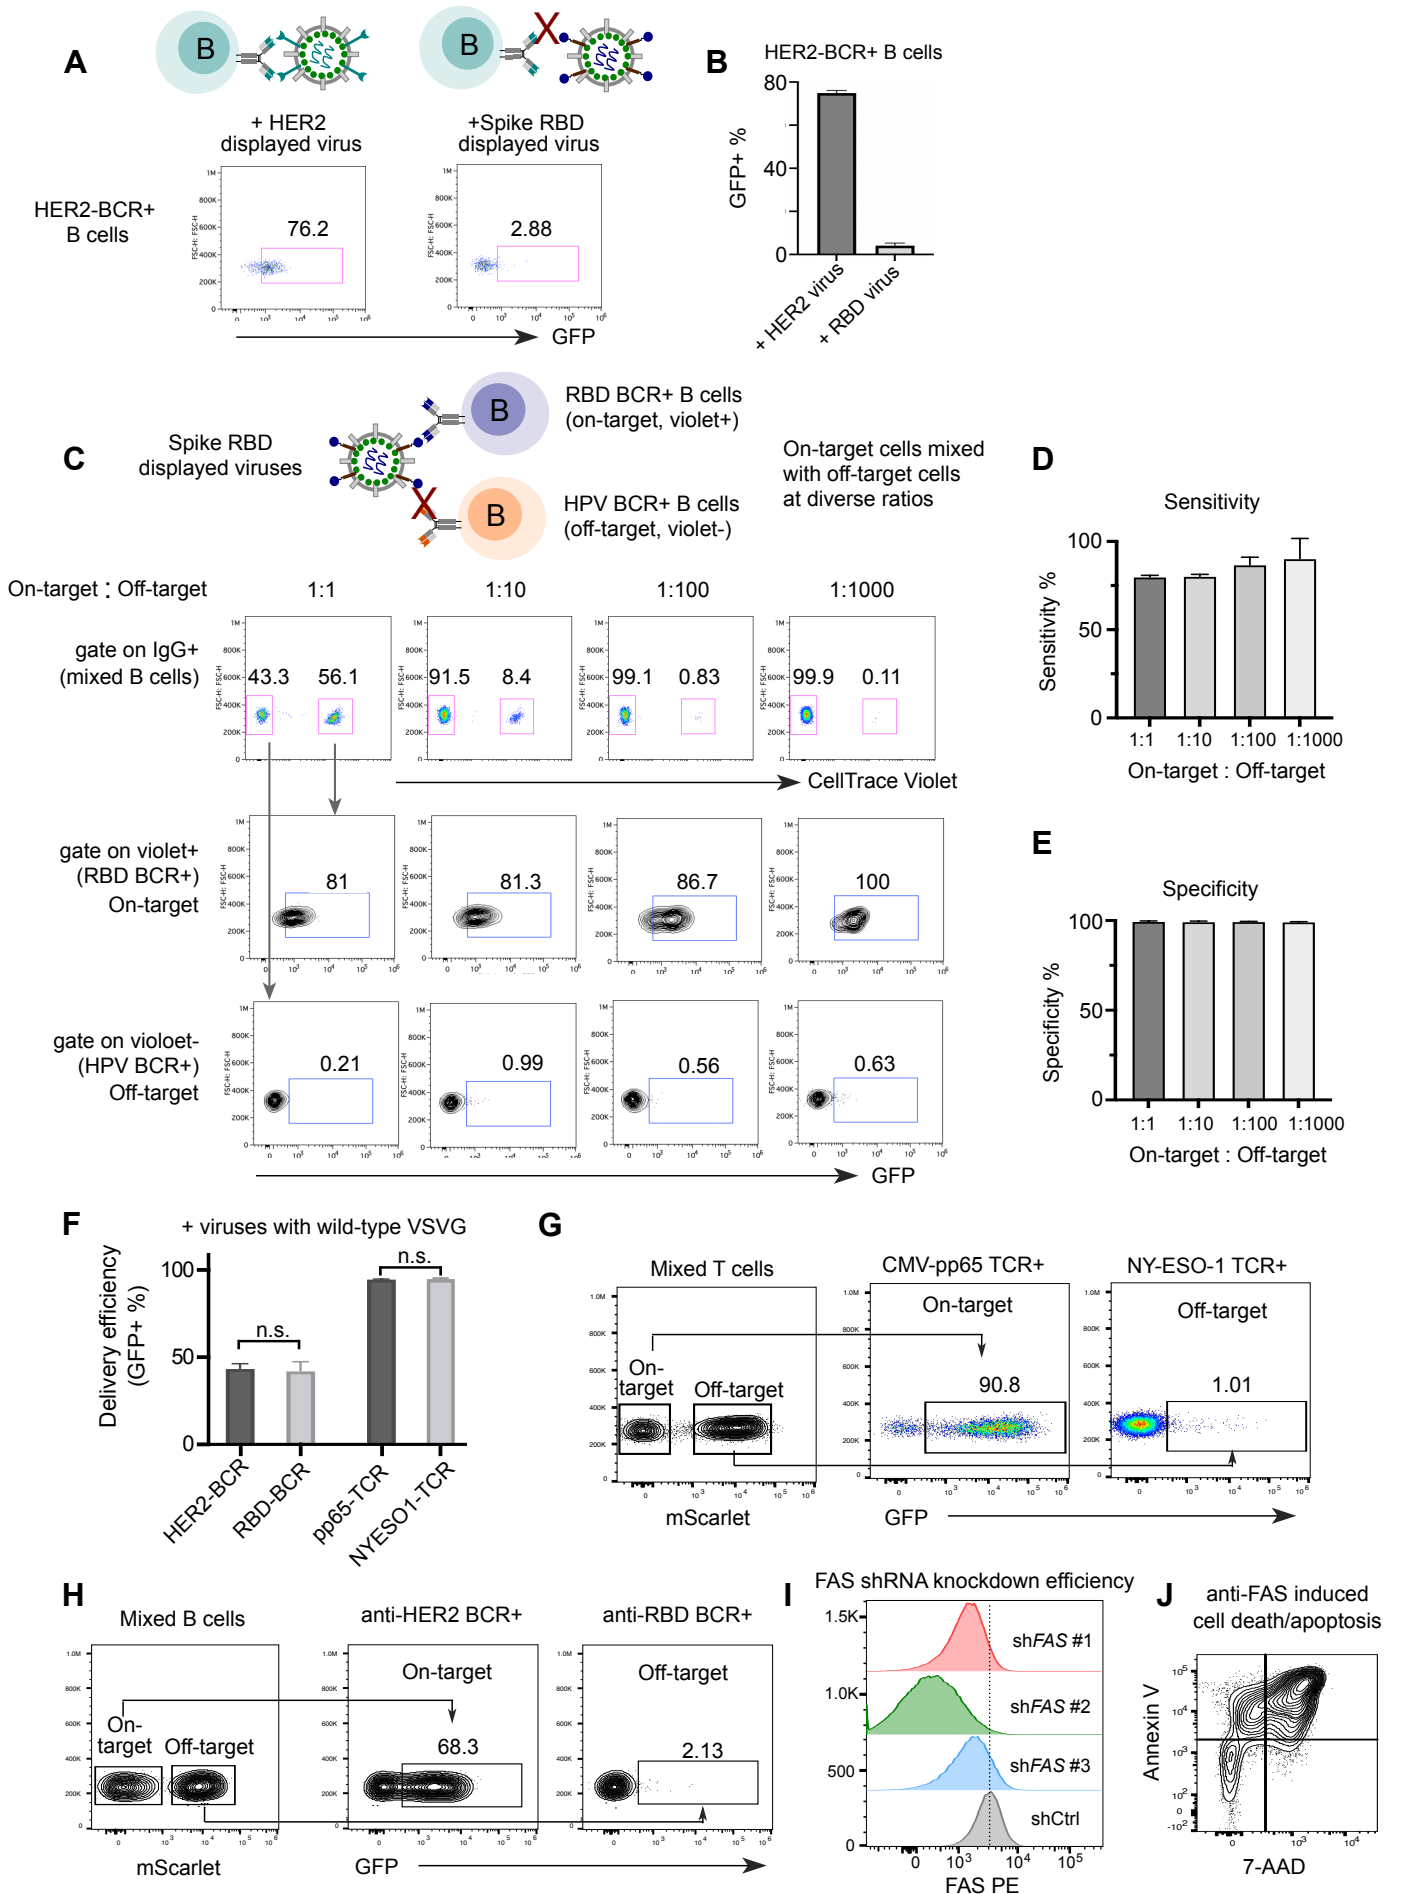

Supplement: NIHMS1851136-supplement-3.pdf [file NIHMS1851136-supplement-3.pdf]

# Supplementary Figure 4

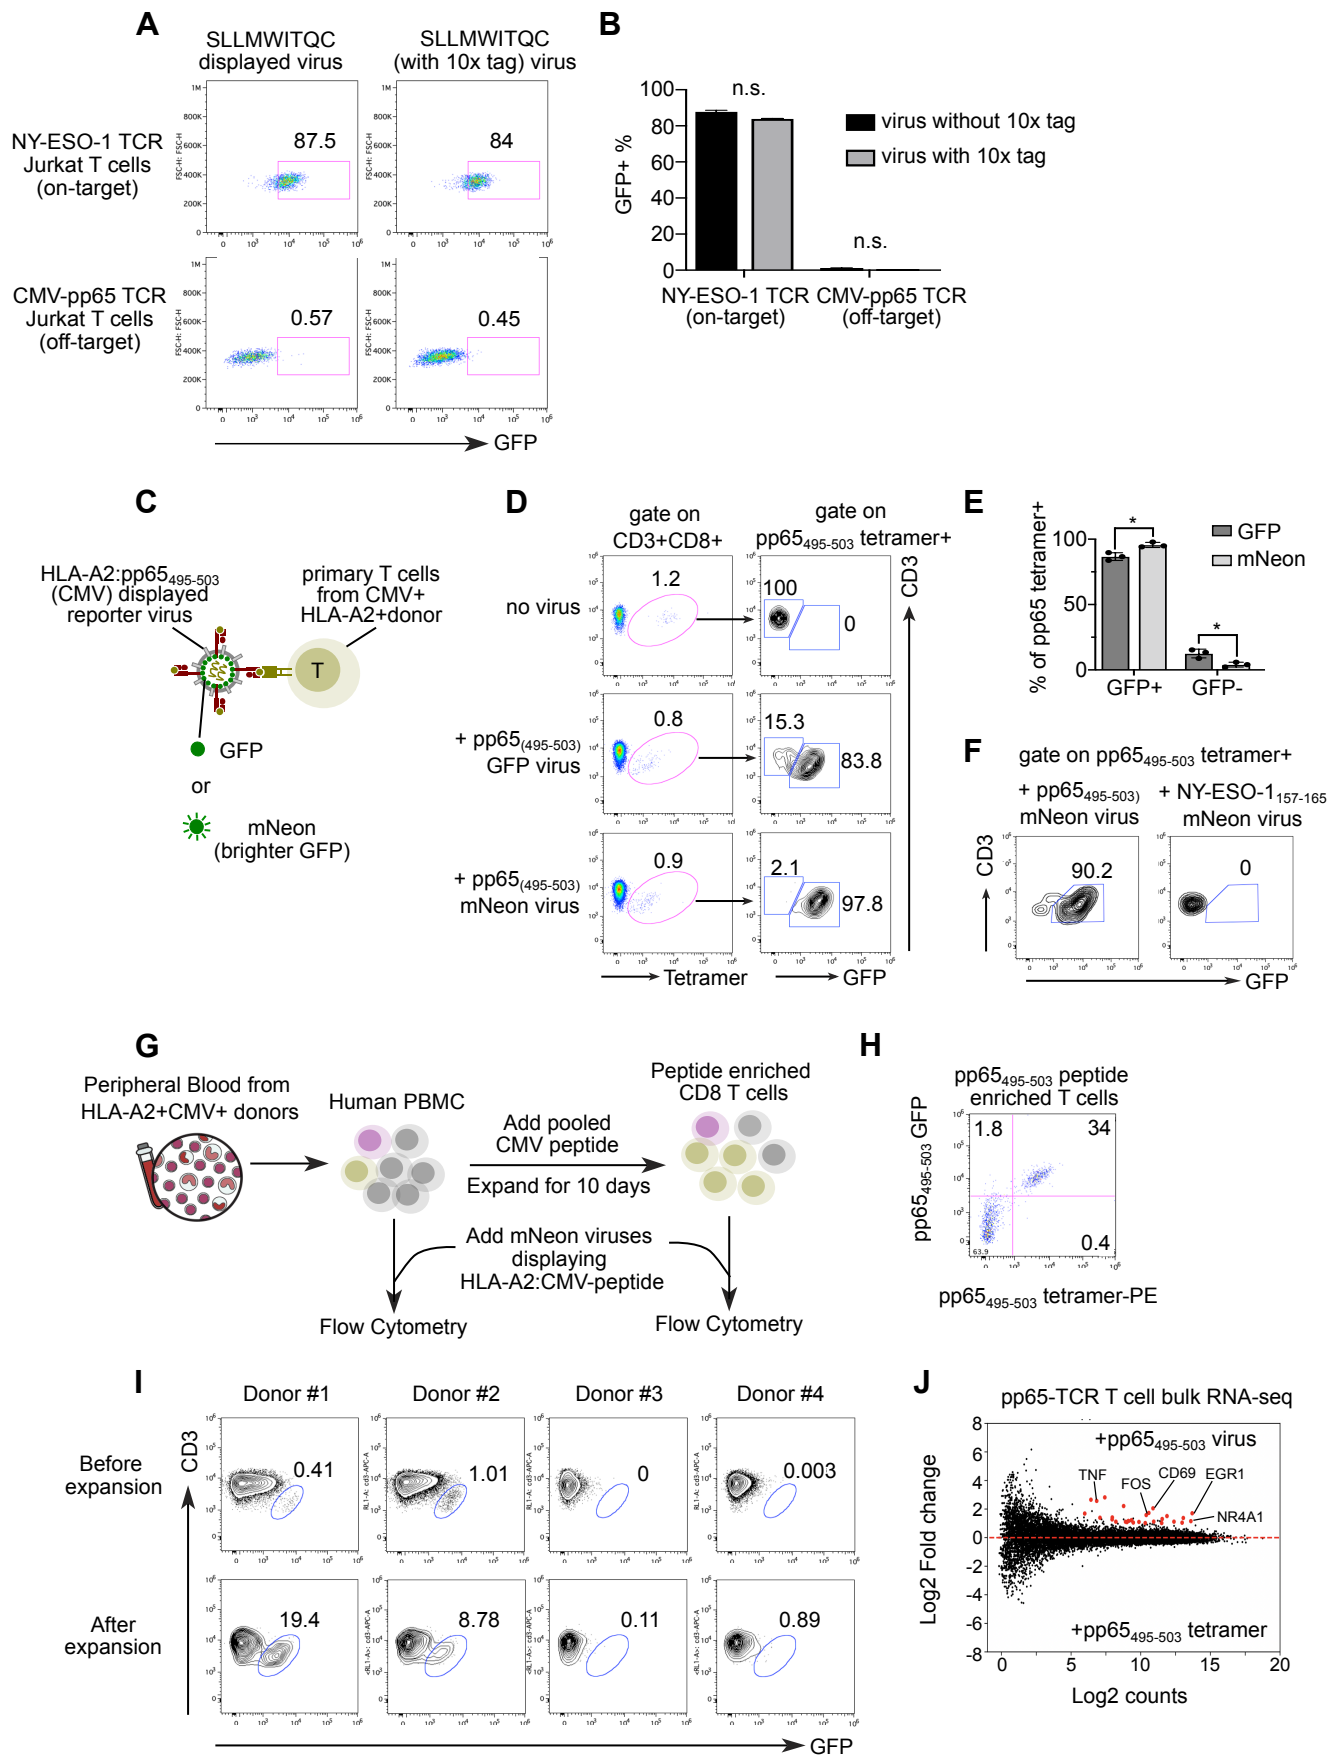

Supplement: NIHMS1851136-supplement-4.pdf [file NIHMS1851136-supplement-4.pdf]

# Supplementary Figure 5

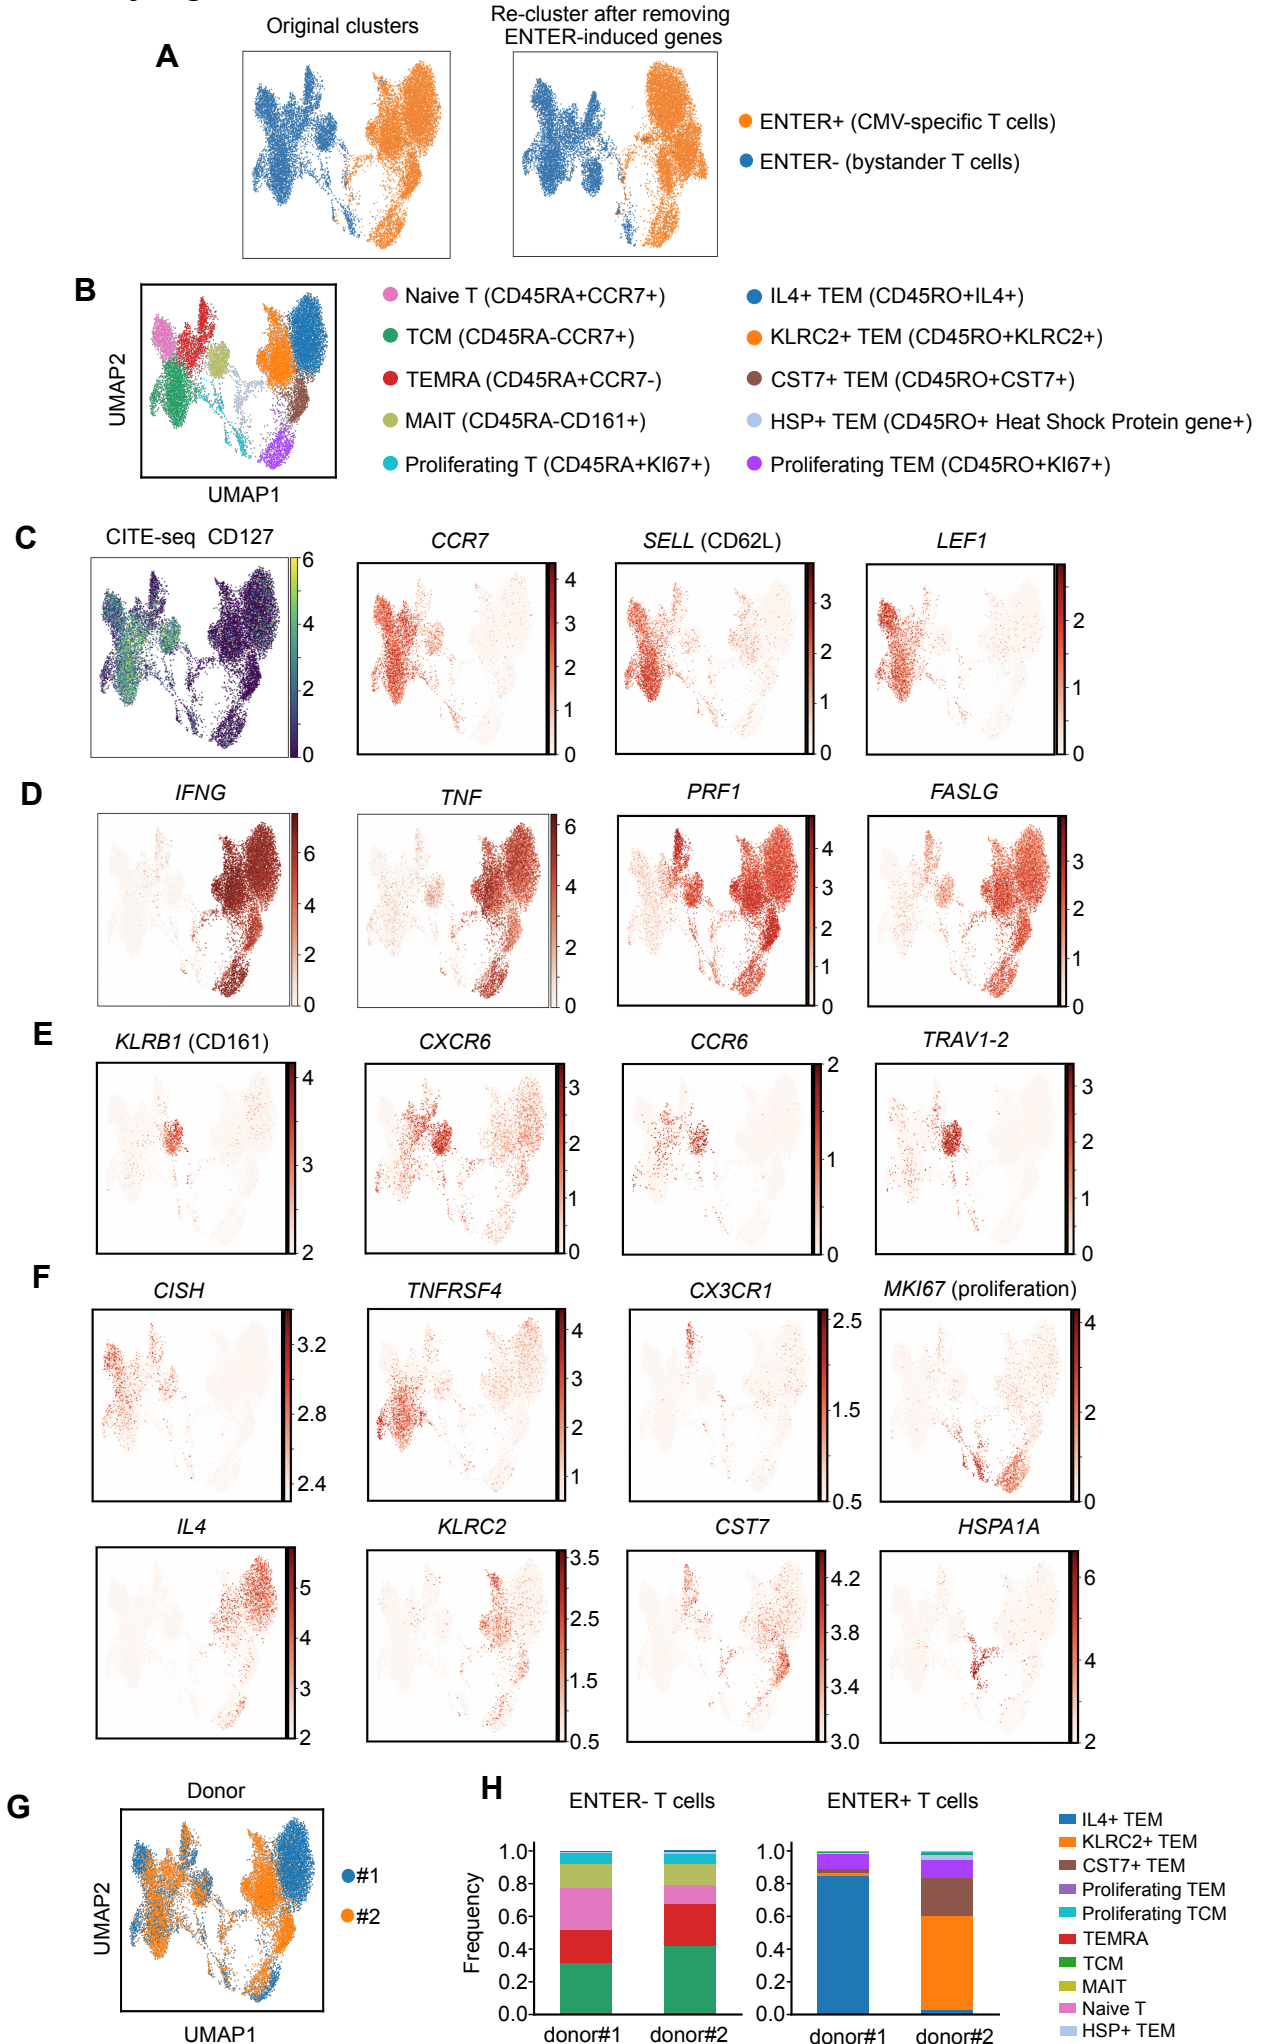

Supplement: NIHMS1851136-supplement-5.pdf [file NIHMS1851136-supplement-5.pdf]

# Supplementary Figure 7

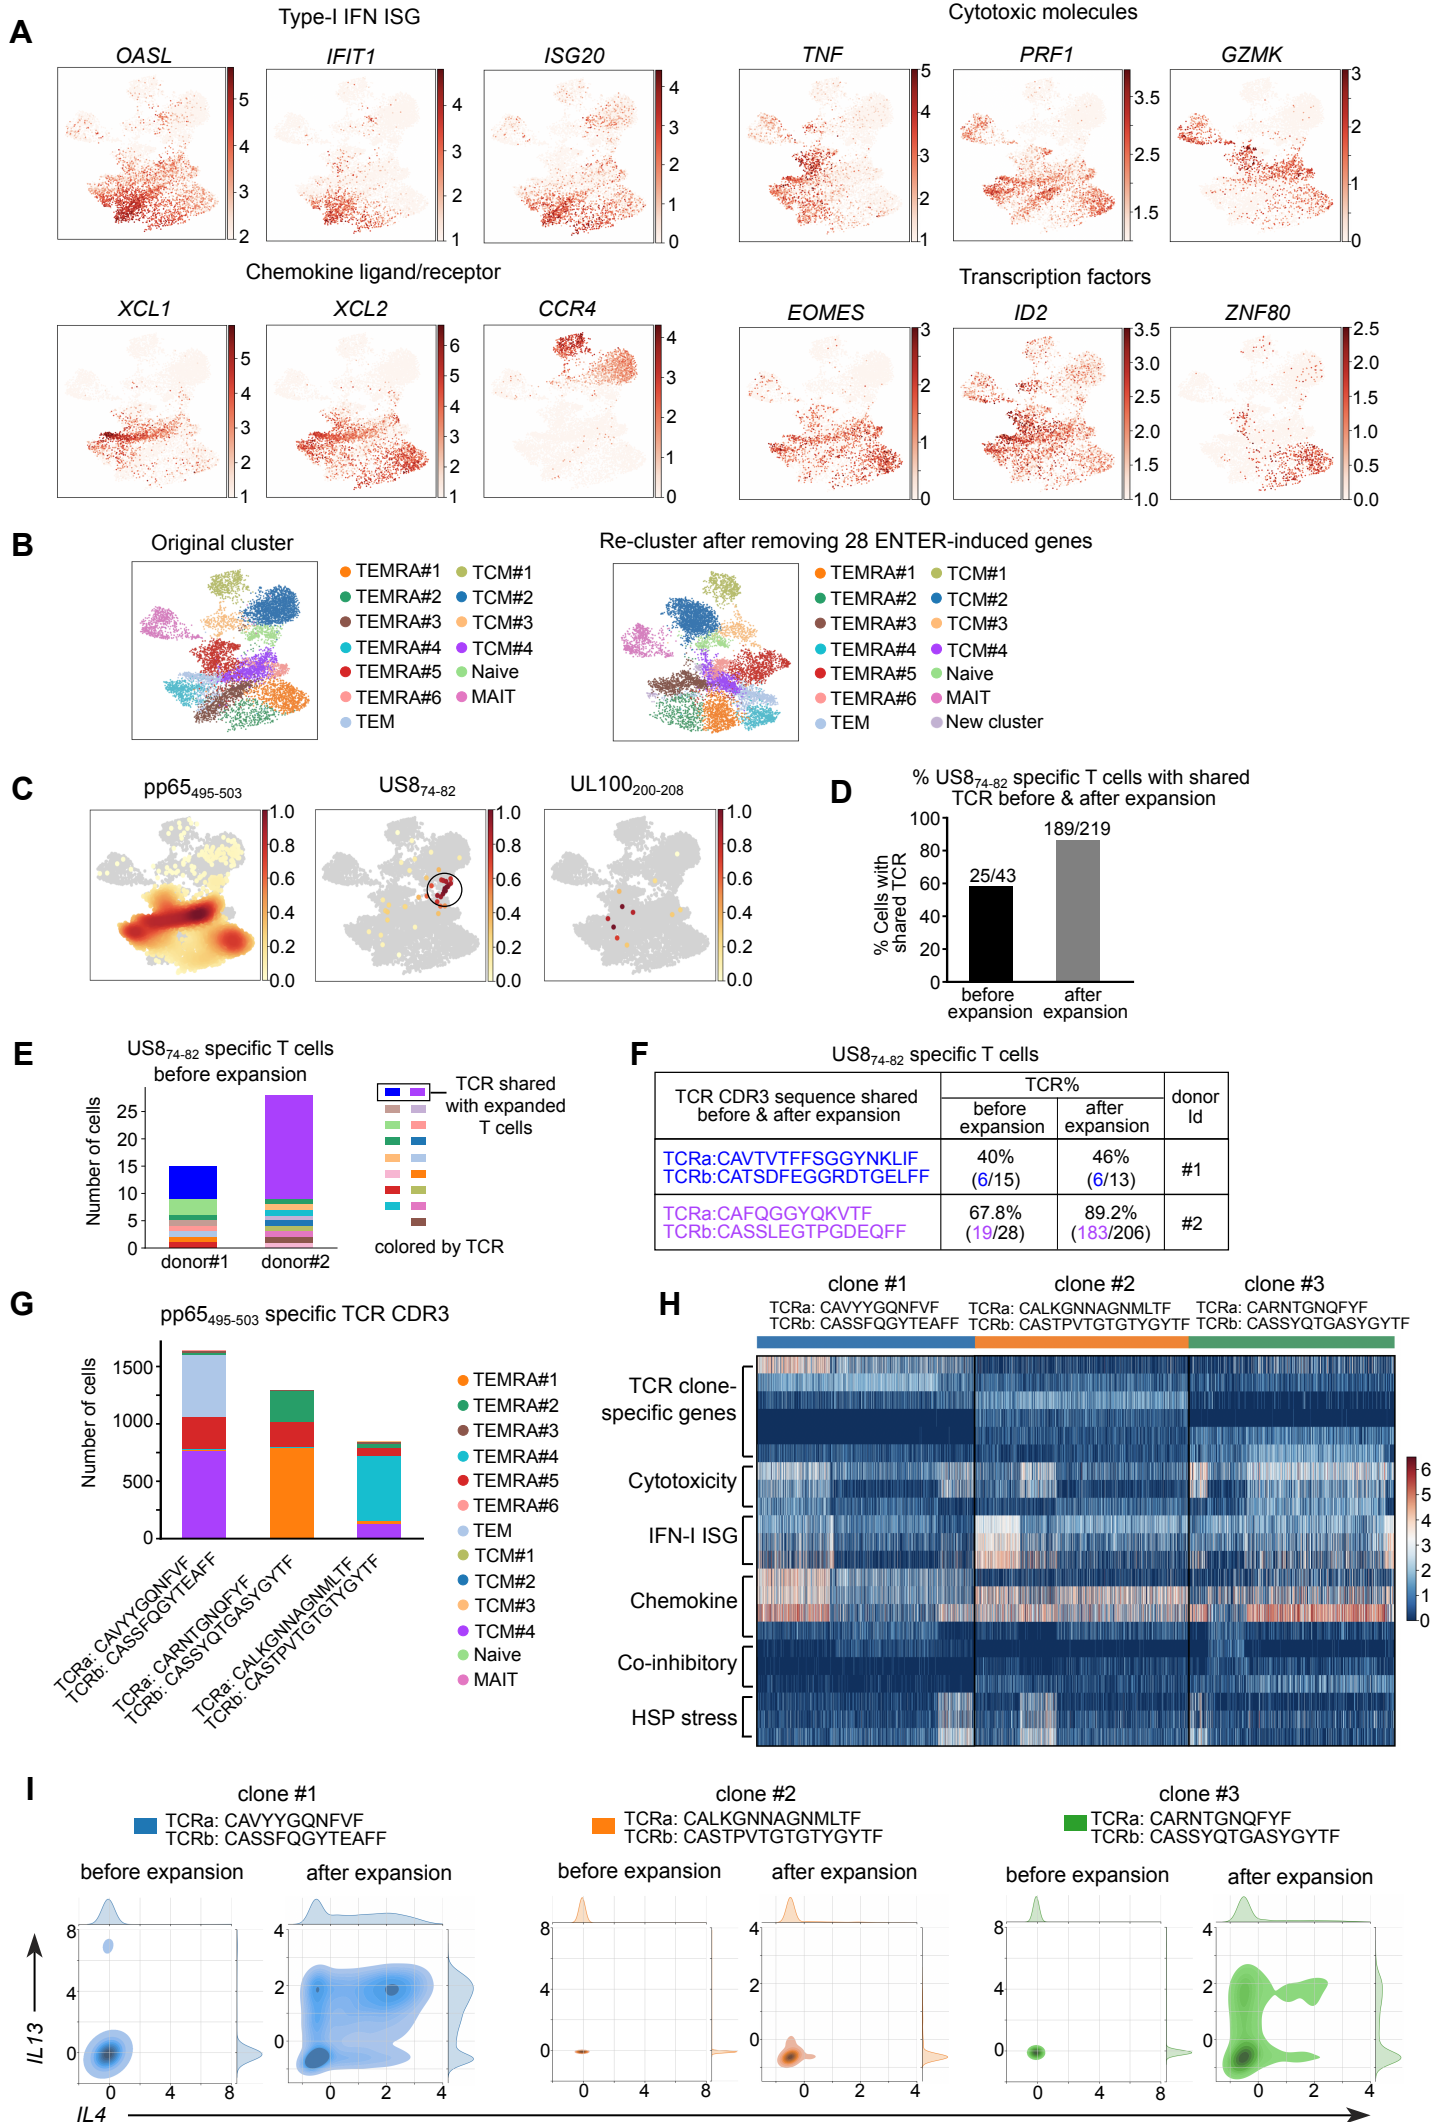

Supplement: NIHMS1851136-supplement-7.pdf [file NIHMS1851136-supplement-7.pdf]
